# Supplementary material for: CISH constrains the tuft–ILC2 circuit to set epithelial and immune tone
Source: PubMed Central journal article supplement (PMC8528700; doi:10.1038/s41385-021-00430-6), 2021-07-21
Supplement: 41385_2021_430_MOESM2_ESM.pdf [file 41385_2021_430_MOESM2_ESM.pdf]

## Supplementary Material

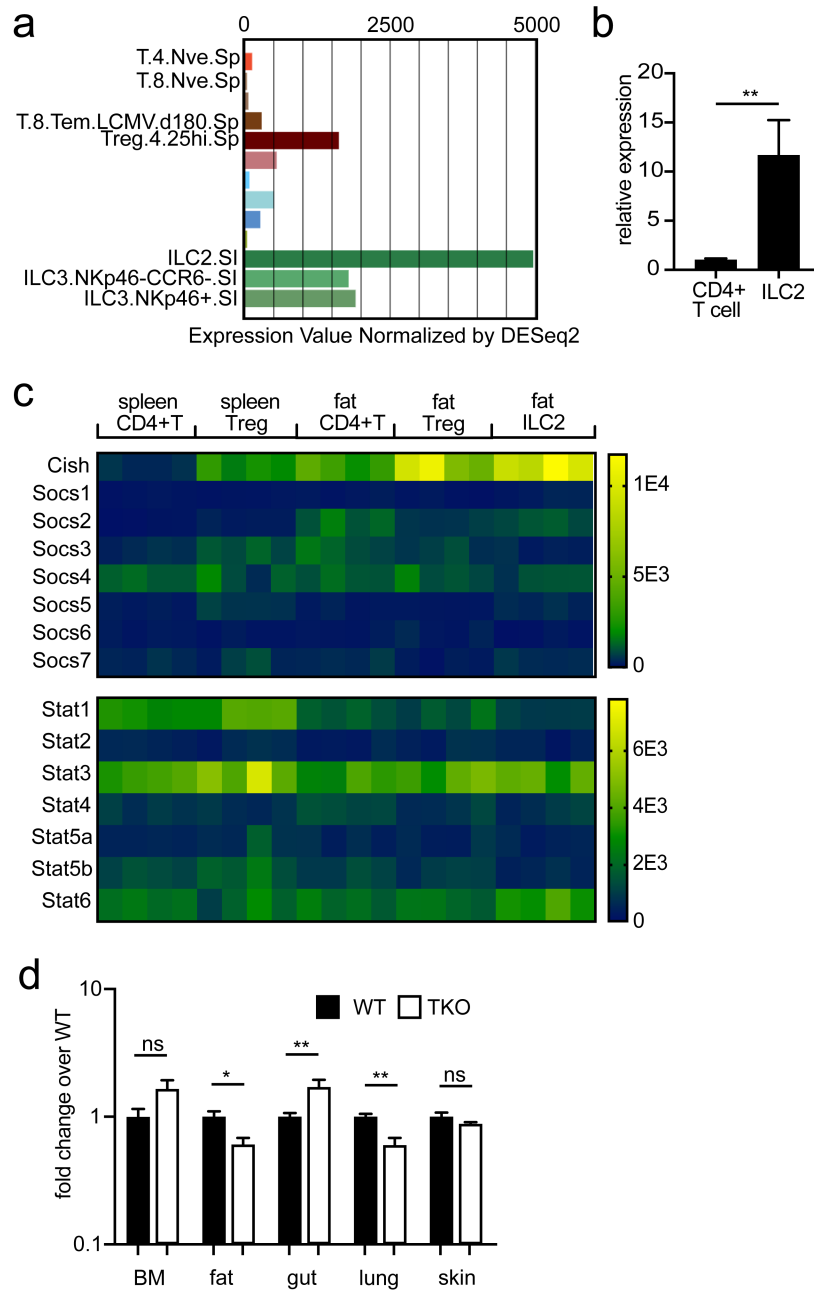

Supplementary Figure 1: CISH is highly expressed in tissue ILC2s. **a** *Cish* is highly expressed in ILC2s compared to other leukocytes. Data adapted from ImmGen. **b** Expression of *Cish* in lung ILC2s or CD4+ T cells. \*\* $p < 0.01$  by 2-tailed t-test.  $n = 4$  mice/tissue. **c** RNA sequencing from purified ILC2s from multiple tissues ILC2s as compared to other tissue resident lymphocytes.

Legend colors indicate counts per million reads. **d** *Cish* expression in WT or  $Il25^{-/-}/Cr1f2^{-/-}/Il1r1^{-/-}$  (“TKO”) mice. \* $p < 0.05$ , \*\* $p < 0.01$ , ns=non-significant by unpaired t-test. n = 3-7 mice/group.

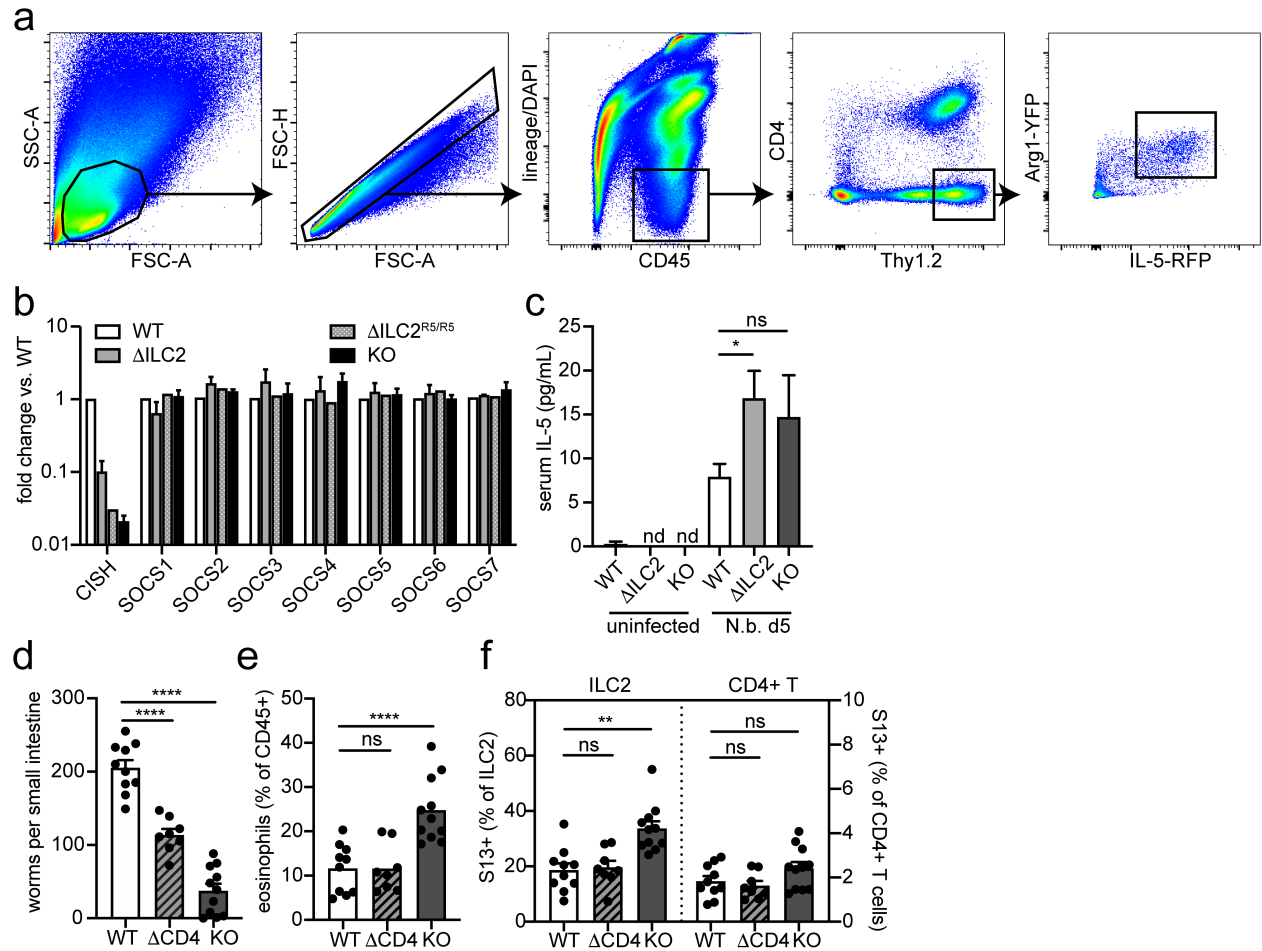

Supplementary Figure 2: CISH knockdown in ILC2s or T cells leads to augmented immunity to helminth challenge. **a** Representative gating strategy for lung ILC2s. **b** Expression of *Cish* and other SOCS family members in lung ILC2s measured by qPCR.  $\Delta$ ILC2<sup>R5/R5</sup> indicates

homozygous expression of R5. Statistics shown for *Cish* in Figure 1a; all others non-significant. n = 3 mice/group. **c** Serum IL-5 measured at day 5 of infection with *N.b.* as in Figure 2. \*p<0.05. n = 6 mice/group. **d** Number of *N.b.* worms in SI on day 5. \*\*\*\*p<0.0001 for one-way ANOVA with Dunnett testing for multiple comparisons. n = 8-11 mice/group; data pooled from 2 similar experiments. **e** Lung eosinophils on infection day 5. \*\*\*p<0.001; ns = non-significant for one-way ANOVA with Dunnett testing for multiple comparisons. n = 8-11 mice/group; data pooled from 2 similar experiments. **f** IL-13 expression (S13) on ILC2s or CD4+ T cells at day 5 of infection.

homozygous expression of R5. Statistics shown for *Cish* in Figure 1a; all others non-significant. n = 3 mice/group. **c** Serum IL-5 measured at day 5 of infection with *N.b.* as in Figure 2. \*p<0.05. n = 6 mice/group. **d** Number of *N.b.* worms in SI on day 5. \*\*\*\*p<0.0001 for one-way ANOVA with Dunnett testing for multiple comparisons. n = 8-11 mice/group; data pooled from 2 similar experiments. **e** Lung eosinophils on infection day 5. \*\*\*p<0.001; ns = non-significant for one-way ANOVA with Dunnett testing for multiple comparisons. n = 8-11 mice/group; data pooled from 2 similar experiments. **f** IL-13 expression (S13) on ILC2s or CD4+ T cells at day 5 of infection.

homozygous expression of R5. Statistics shown for *Cish* in Figure 1a; all others non-significant. n = 3 mice/group. **c** Serum IL-5 measured at day 5 of infection with *N.b.* as in Figure 2. \*p<0.05. n = 6 mice/group. **d** Number of *N.b.* worms in SI on day 5. \*\*\*\*p<0.0001 for one-way ANOVA with Dunnett testing for multiple comparisons. n = 8-11 mice/group; data pooled from 2 similar experiments. **e** Lung eosinophils on infection day 5. \*\*\*p<0.001; ns = non-significant for one-way ANOVA with Dunnett testing for multiple comparisons. n = 8-11 mice/group; data pooled from 2 similar experiments. **f** IL-13 expression (S13) on ILC2s or CD4+ T cells at day 5 of infection.

homozygous expression of R5. Statistics shown for *Cish* in Figure 1a; all others non-significant. n = 3 mice/group. **c** Serum IL-5 measured at day 5 of infection with *N.b.* as in Figure 2. \*p<0.05. n = 6 mice/group. **d** Number of *N.b.* worms in SI on day 5. \*\*\*\*p<0.0001 for one-way ANOVA with Dunnett testing for multiple comparisons. n = 8-11 mice/group; data pooled from 2 similar experiments. **e** Lung eosinophils on infection day 5. \*\*\*p<0.001; ns = non-significant for one-way ANOVA with Dunnett testing for multiple comparisons. n = 8-11 mice/group; data pooled from 2 similar experiments. **f** IL-13 expression (S13) on ILC2s or CD4+ T cells at day 5 of infection.

homozygous expression of R5. Statistics shown for *Cish* in Figure 1a; all others non-significant. n = 3 mice/group. **c** Serum IL-5 measured at day 5 of infection with *N.b.* as in Figure 2. \*p<0.05. n = 6 mice/group. **d** Number of *N.b.* worms in SI on day 5. \*\*\*\*p<0.0001 for one-way ANOVA with Dunnett testing for multiple comparisons. n = 8-11 mice/group; data pooled from 2 similar experiments. **e** Lung eosinophils on infection day 5. \*\*\*p<0.001; ns = non-significant for one-way ANOVA with Dunnett testing for multiple comparisons. n = 8-11 mice/group; data pooled from 2 similar experiments. **f** IL-13 expression (S13) on ILC2s or CD4+ T cells at day 5 of infection.

homozygous expression of R5. Statistics shown for *Cish* in Figure 1a; all others non-significant. n = 3 mice/group. **c** Serum IL-5 measured at day 5 of infection with *N.b.* as in Figure 2. \*p<0.05. n = 6 mice/group. **d** Number of *N.b.* worms in SI on day 5. \*\*\*\*p<0.0001 for one-way ANOVA with Dunnett testing for multiple comparisons. n = 8-11 mice/group; data pooled from 2 similar experiments. **e** Lung eosinophils on infection day 5. \*\*\*p<0.001; ns = non-significant for one-way ANOVA with Dunnett testing for multiple comparisons. n = 8-11 mice/group; data pooled from 2 similar experiments. **f** IL-13 expression (S13) on ILC2s or CD4+ T cells at day 5 of infection.

homozygous expression of R5. Statistics shown for *Cish* in Figure 1a; all others non-significant. n = 3 mice/group. **c** Serum IL-5 measured at day 5 of infection with *N.b.* as in Figure 2. \*p<0.05. n = 6 mice/group. **d** Number of *N.b.* worms in SI on day 5. \*\*\*\*p<0.0001 for one-way ANOVA with Dunnett testing for multiple comparisons. n = 8-11 mice/group; data pooled from 2 similar experiments. **e** Lung eosinophils on infection day 5. \*\*\*p<0.001; ns = non-significant for one-way ANOVA with Dunnett testing for multiple comparisons. n = 8-11 mice/group; data pooled from 2 similar experiments. **f** IL-13 expression (S13) on ILC2s or CD4+ T cells at day 5 of infection.

\*\*p<0.01 for Brown-Forsythe and Welch ANOVA with Dunnett correction for multiple comparison. ns=non-significant. n = 8-11 mice/group pooled from 2 similar experiments.

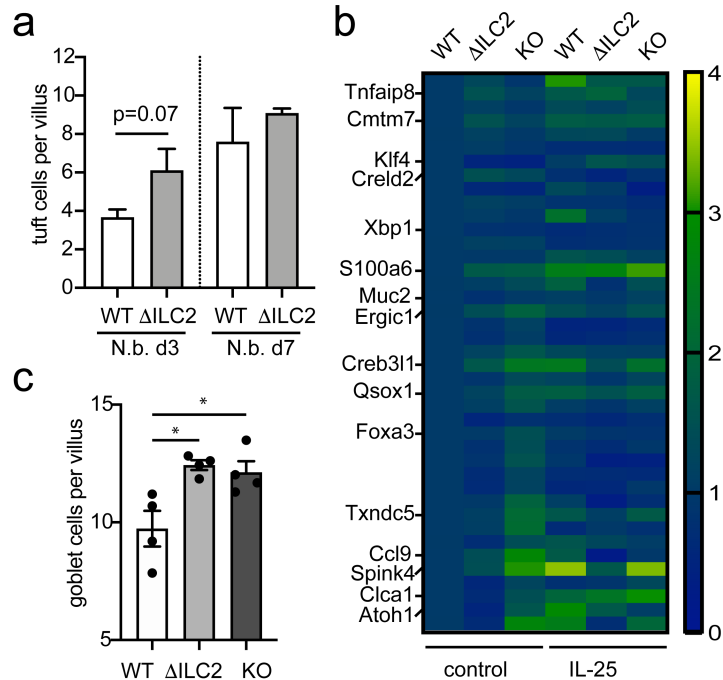

**Supplementary Figure 3: CISH constraint of ILC2 outputs controls secretory cell development in the intestine.** **a** Tuft cells per villus counted from immunofluorescence staining of intestines from *N.b.*-infected mice at indicated timepoints. Numbers indicate average  $\pm$  SEM over a minimum of 10 intact villi from each of 4-5 mice/group. **b** Goblet cell markers in whole intestinal tissue harvested from IL-25- or untreated mice. Each block represents row-normalized mean expression in 3 mice/group. **c** Goblet cells counted from PAB-stained sections of untreated mice of indicated genotypes. Numbers indicate average  $\pm$  SEM over a minimum of 10 intact villi from each of 4 mice/group. \* $P < 0.05$  by one-way ANOVA with Dunnett testing for multiple comparisons.

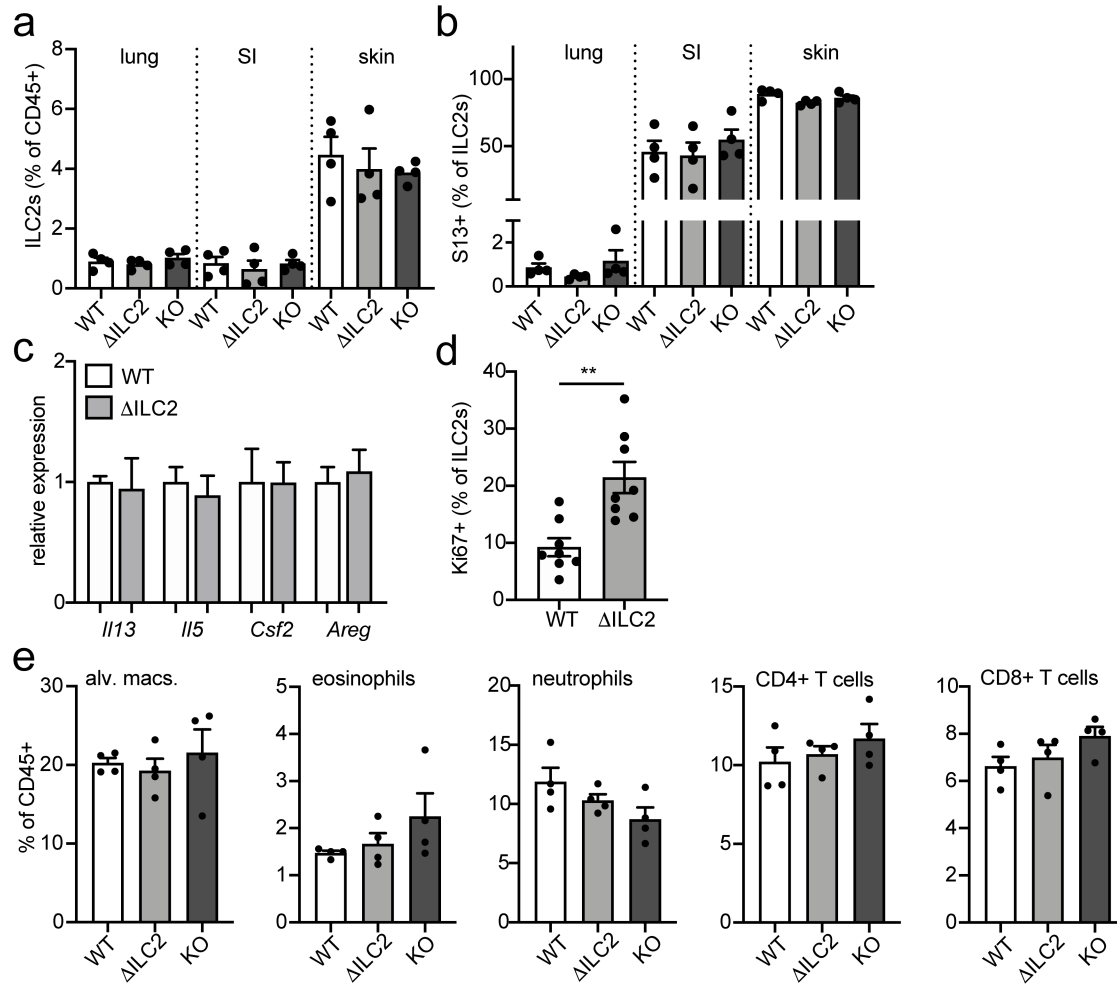

**Supplementary Figure 4: Loss of CISH in ILC2s yields increased tissue ILC2 turnover without affecting steady state numbers.** **a** Proportion of ILC2s in the lung, SI, and skin. n = 4

mice/group, representative of 2 similar experiments. **b** IL-13 expression in ILC2s in the lung, SI, and skin. n = 4 mice/group. **c** Expression of indicated effector genes in sorted lung ILC2s. n = 3-

9 mice/group, pooled from 2 of 3 similar experiments. **d** Ki67 expression measured by flow cytometry from freshly-isolated SI ILC2s. n = 8 mice/group, pooled from 2 similar experiments.

\*\*p < 0.01. **e** Leukocyte subsets (as indicated) in from lung of untreated mice. n = 4 mice/group, representative of 2 similar experiments.

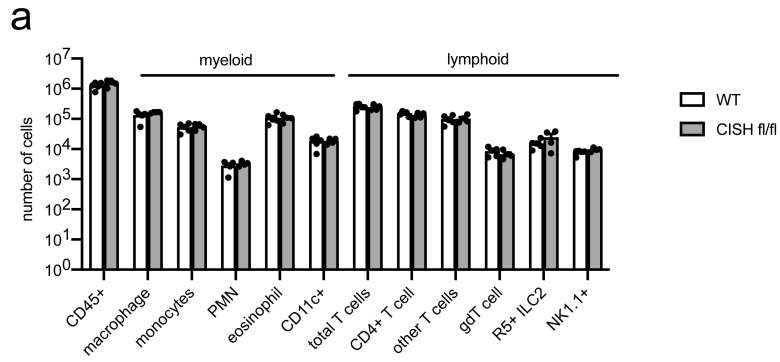

Supplementary Figure 5: Loss of CISH in ILC2s yields no significant differences in numbers of intestinal immune cells during *Salmonella* infection. **a** number of cells counted per centimeter of jejunum.

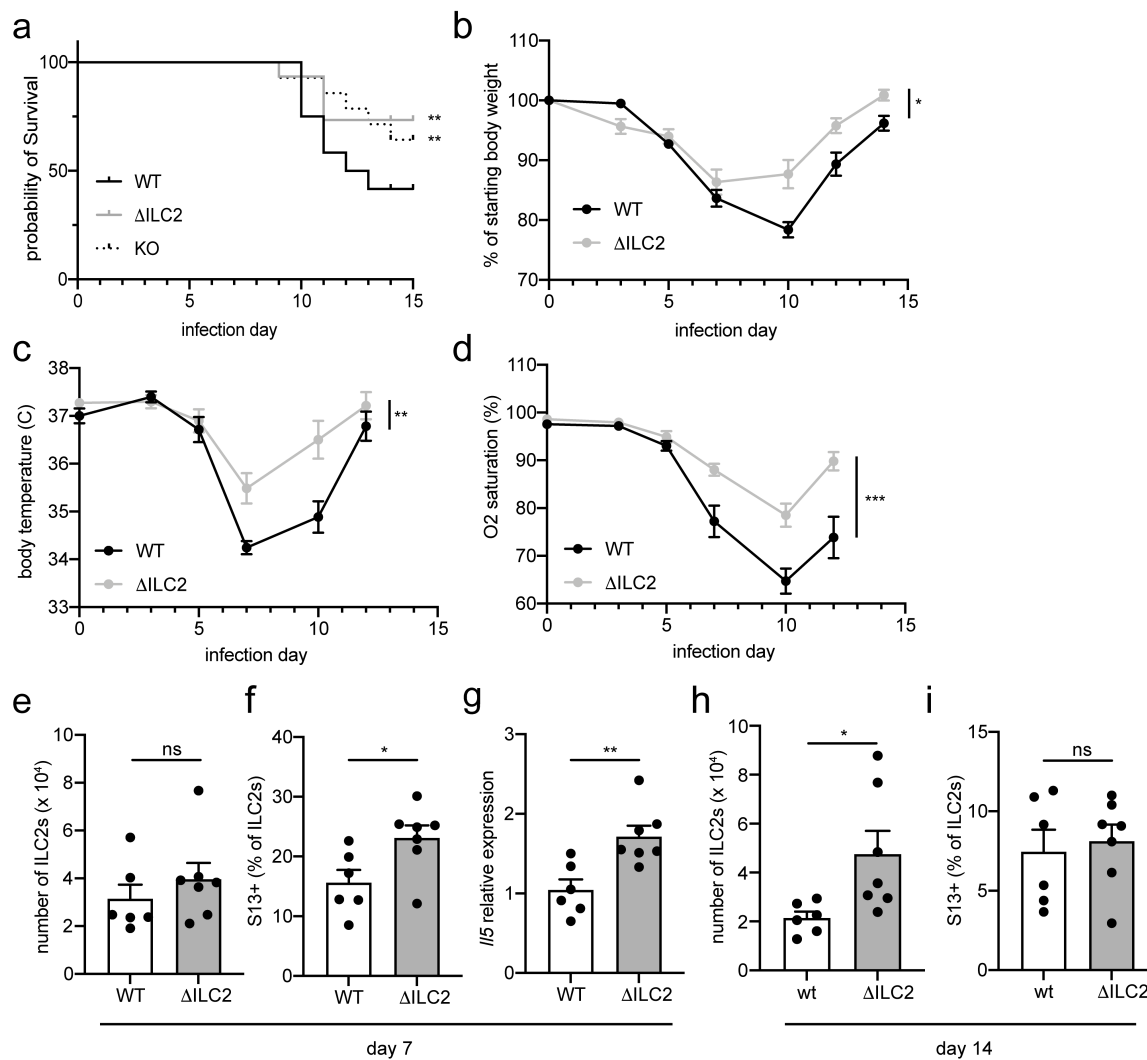

**Supplementary Figure 6: Augmented ILC2 activity through CISH deletion improves survival during influenza infection.** **a** Survival after influenza PR8 in indicated strains. n = 12-15 mice per group, pooled from two experiments. **b** Body weight, **c** body temperature and, **d** oxygen saturation measured in indicated genotypes. for (a-d), \*p<0.05, \*\*p<0.01, \*\*\*p<0.001 for differences between genotype by 2-way ANOVA. n = 7 mice/group. **e** Number of lung ILC2s and **f** S13 reporter expression on lung ILC2s on day 7 of influenza infection. **g** *I/I5* transcripts in whole lung tissue on day 7 of influenza infection. **h** number of lung ILC2s and **i** S13 reporter



expression on lung ILC2s on day 14 of influenza infection. for (e-i), \* $p < 0.05$ , \*\* $p < 0.01$ , ns = non-significant by t-test. n = 6-7 mice/group.

Supplementary Table 1: Antibodies used

Supplementary Table 2: Primers used for qRT-PCR

| <b>Gene symbol</b> | <b>Forward Primer</b>        | <b>Reverse Primer</b>    |
|--------------------|------------------------------|--------------------------|
| <i>Areg</i>        | CAGCTATTGGCATCGGCATC         | TTCAACTTTTACCCTGCATTGTCC |
| <i>Ccl2</i>        | AGGTCCCTGTCATGCTTCTGG        | CTGCTGCTGGTGATCCTCTTG    |
| <i>Cd36</i>        | GCTTGCAACTGTCAGCACAT         | GCCTTGCTGTAGCCAAGAAC     |
| <i>Chil3</i>       | CAGGTCTGGCAATTCTTCTGAA       | GTCTTGCTCATGTGTGTAAGTGA  |
| <i>Cish</i>        | ATGGTCCTTTGCGTACAGGG         | GGAATGCCCCAGTGGGTAAG     |
| <i>Clec10a</i>     | CAGAATCGCTTAGCCAATGTGG       | TCCCAGTCCGTGTCCGAAC      |
| <i>Csf2</i>        | TCAGAGAGAAAGGCTAAGGTCC       | CTCTTCATTCAACGTGACAGGC   |
| <i>Cxcl10</i>      | CCAAGTGCTGCCGTCATTTTC        | GGCTCGCAGGGATGATTTCAA    |
| <i>Cxcl9</i>       | TCCTTTTGGGCATCATCTTCC        | TTTGTAGTGGATCGTGCCCTCG   |
| <i>Hprt</i>        | GTTGGATACAGGCCAGACTTTGTTG    | GAGGGTAGGCTGGCCTATAGGCT  |
| <i>Ifng</i>        | CATTGAAAGCCTAGAAAGTCTGAATAAC | TGGCTCTGCAGGATTTTCATG    |
| <i>Il10</i>        | GCTGGACAACATACTGCTAACCG      | CCTTGCTCTTATTTTCACAGGGG  |
| <i>Il13</i>        | GGATATTGCATGGCCTCTGTAAC      | AACAGTTGCTTTGTGTAGCTGA   |
| <i>Il17a</i>       | AGCAGCGATCATCCCTCAAAG        | GTCTTCATTGCGGTGGAGAGTC   |
| <i>Il2</i>         | TGAGCAGGATGGAGAATTACAGG      | GTCCAAGTTCATCTTCTAGGCAC  |
| <i>Il22</i>        | TCAGACAGGTTCCAGCCCTA         | CAGGTCCAGTTCCTCCAATCG    |
| <i>Il4</i>         | GCTCGTCTGTAGGGCTTCC          | GTGCAGCTTATCGATGAATCCAG  |
| <i>Il5</i>         | CTCTGTTGACAAGCAATGAGACG      | TCTTCAGTATGTCTAGCCCCTG   |
| <i>Il9</i>         | ATGTTGGTGACATACATCCTTGC      | TGACGGTGGATCATCCTTCAG    |
| <i>Nos2</i>        | GAATCTTGGAGCGAGTTGTGG        | CAGGAAGTAGGTGAGGGCTTG    |
| <i>Retnla</i>      | CCAATCCAGCTAACTATCCCTCC      | ACCCAGTAGCAGTCATCCCA     |
| <i>Rpl13a</i>      | GAGGTCGGGTGGAAGTACCA         | TGCATCTTGGCCTTTTCCTT     |
| <i>Tnfa</i>        | TCTGTCTACTGAACTTCGGGGTG      | ACTTGGTGGTTTGCTACGACG    |

Supplementary Table 3: List of gene symbols for consensus “tuft cell” and “goblet cell” identities corresponding to heatmaps in Figure 3c and Supplementary Figure 3b

Supplementary Table 4: Selected outputs from Gene Set Enrichment Analysis
